# Supplementary material for: First Reported Implementation of Lenalidomide as Maintenance Therapy for Metastatic Follicular Dendritic Cell Sarcoma
Source: Research Square preprint supplement (doi:10.21203/rs.3.rs-6827215/v1), 2025-07-04
Supplement: Supplementary file 1 [file f8a55a773723ad2f394f44f9.pdf]

Supplementary Figures

FINAL RESULTS SUMMARY

Signatera Negative



MTM/mL:  
Not Detected

Mean tumor molecules per mL is calculated based on the mean of ctDNA molecules detected per mL of the patient's plasma. See Limitations section below.

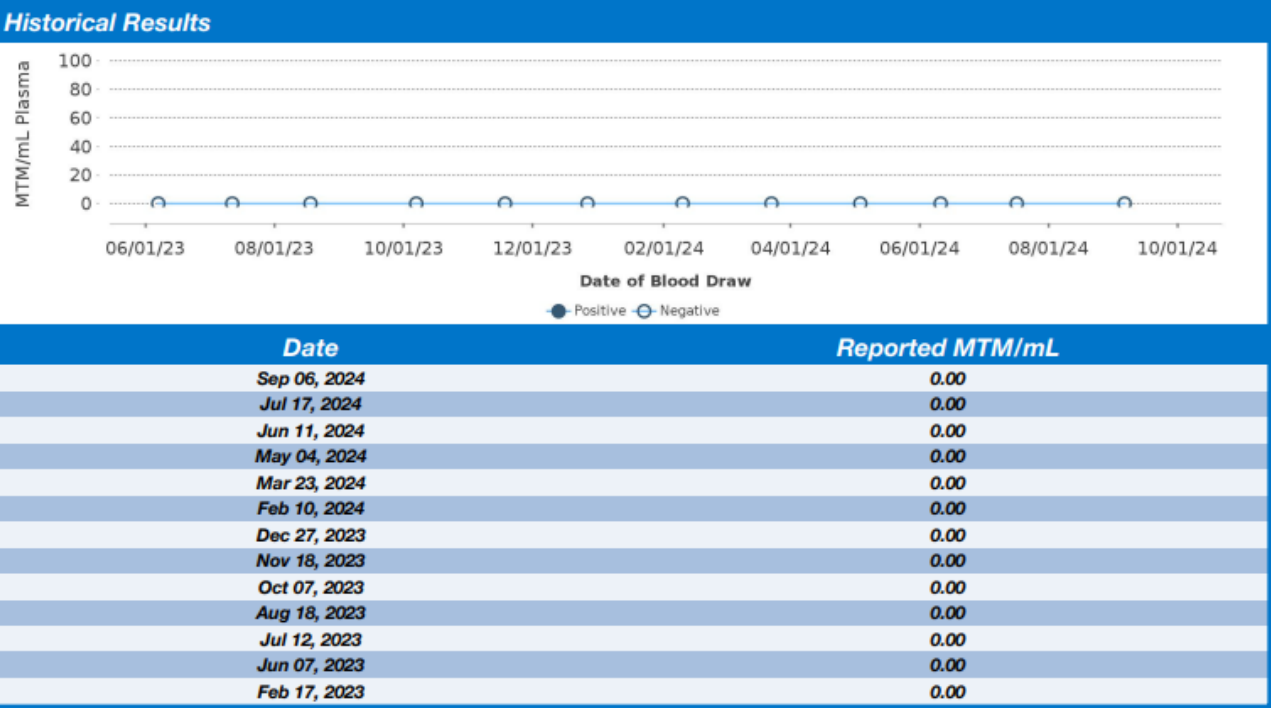

Supplemental Figure 1. Natera Test for Circulating Tumor DNA from 2023 shows no significant MTM/mL Plasma after recurrence of FDGS
